# Supplementary material for: Cerebellar Purkinje cell stripe patterns reveal a differential vulnerability and resistance to cell loss during normal aging in mice
Source: eLife. 2025 Dec 1;14:RP106273. doi: 10.7554/eLife.106273 (PMC12668675; doi:10.7554/eLife.106273)
Supplement: Figure 1—figure supplement 1—source data 1. [file elife-106273-fig1-figsupp1-data1.xlsx]

## Sheet: Supp. Fig. 1
Figure	Panel
Supplementary 1	B		Distance	0	1.179	2.358	3.538	4.717	5.896	7.075	8.255	9.434	10.613	11.792	12.972	14.151	15.33	16.509	17.689	18.868	20.047	21.226	22.406	23.585	24.764	25.943	27.123	28.302	29.481	30.66	31.84	33.019	34.198	35.377	36.557	37.736	38.915	40.094	41.274	42.453	43.632	44.811	45.991	47.17	48.349	49.528	50.708	51.887	53.066
		Non-striped PC loss	Mean	0.00847725	0.008531	0.008595	0.0085745	0.00860275	0.008541	0.0085995	0.00862	0.008628	0.00856925	0.00863475	0.0086305	0.008681	0.00865525	0.00867375	0.0086465	0.00871	0.008662	0.00860925	0.008502	0.0086405	0.008737	0.00890725	0.00895325	0.00890075	0.00873075	0.00863175	0.00849475	0.0086665	0.00880125	0.00891025	0.00892025	0.008838	0.00868625	0.0087275	0.00870075	0.008764	0.00872825	0.00886425	0.00892575	0.00895225	0.00891125	0.00887875	0.00873375	0.0086515	0.008531
			SEM	0.000558059	0.000575635	0.000640278	0.000680549	0.000686373	0.000647474	0.000621825	0.000592975	0.000601881	0.000595796	0.000663064	0.000710287	0.00069409	0.000634939	0.000605992	0.000573082	0.000594601	0.000577653	0.0005144	0.000419772	0.000430592	0.00045071	0.000579042	0.000654662	0.000679482	0.000652927	0.000600669	0.000543628	0.000592169	0.000633056	0.000622744	0.000602153	0.000584844	0.000577436	0.000674662	0.000778866	0.000788325	0.000700635	0.000635634	0.000633833	0.000649284	0.000651519	0.000663571	0.000651543	0.00062928	0.000588495
			N	4	4	4	4	4	4	4	4	4	4	4	4	4	4	4	4	4	4	4	4	4	4	4	4	4	4	4	4	4	4	4	4	4	4	4	4	4	4	4	4	4	4	4	4	4	4
		Striped PC loss	Mean	0.006338	0.0062995	0.006212	0.0061355	0.00613425	0.00612825	0.00611875	0.00610775	0.0061575	0.006216	0.00617375	0.00612	0.006135	0.0061605	0.006145	0.006121	0.00604925	0.00597725	0.005955	0.005962	0.0060135	0.00606725	0.0060565	0.0060375	0.00598925	0.00594425	0.005941	0.0059485	0.00597425	0.00600025	0.0059995	0.0060045	0.00603925	0.006073	0.00606175	0.006049	0.0060325	0.006029	0.0060245	0.00602425	0.00607275	0.0061205	0.00611375	0.00609425	0.00607975	0.0060685
			SEM	0.000403735	0.000361777	0.000351944	0.000341285	0.00033635	0.000321284	0.000318221	0.000319478	0.000339307	0.000356503	0.000360036	0.000355878	0.000357614	0.000354458	0.0003443	0.000327577	0.000320272	0.000306709	0.000305552	0.000299496	0.000289462	0.000275295	0.000267527	0.00026113	0.000283773	0.000301534	0.000298243	0.000295284	0.000315032	0.000328364	0.000310334	0.000285358	0.000286221	0.000283962	0.00027134	0.000257806	0.000297709	0.000335205	0.000333756	0.000318234	0.00032399	0.000333654	0.000363286	0.000383042	0.000388802	0.000385581
			N	4	4	4	4	4	4	4	4	4	4	4	4	4	4	4	4	4	4	4	4	4	4	4	4	4	4	4	4	4	4	4	4	4	4	4	4	4	4	4	4	4	4	4	4	4	4
Supplementary 1	B'	Distance	0	1.179	2.358	3.538	4.717	5.896	7.075	8.255	9.434	10.613	11.792	12.972	14.151	15.33	16.509	17.689	18.868	20.047	21.226	22.406	23.585	24.764	25.943	27.123	28.302	29.481	30.66	31.84	33.019	34.198	35.377	36.557	37.736	38.915	40.094	41.274	42.453	43.632	44.811	45.991	47.17	48.349	49.528	50.708	51.887	53.066	54.245
		Non-striped PC loss	0.007409	0.007484	0.007539	0.007552	0.007569	0.007551	0.007595	0.007625	0.00761	0.007567	0.00754	0.007493	0.007522	0.007542	0.007536	0.007494	0.007579	0.007659	0.007763	0.007848	0.007956	0.008022	0.007966	0.007829	0.007728	0.007599	0.007605	0.007604	0.00766	0.007684	0.007612	0.007518	0.007514	0.007492	0.007651	0.007797	0.007812	0.007766	0.007701	0.007606	0.007575	0.007522	0.007539	0.007531	0.007563	0.007607	0.007712
		Non-striped PC loss	0.010035	0.010159	0.01045	0.010574	0.010595	0.010369	0.010288	0.010161	0.01026	0.010236	0.01055	0.010708	0.01068	0.010384	0.010284	0.010141	0.010306	0.010248	0.010029	0.009658	0.009824	0.009975	0.010481	0.010686	0.010751	0.010547	0.010361	0.010075	0.010382	0.010608	0.010504	0.010101	0.010138	0.010175	0.010691	0.011033	0.011122	0.010801	0.010546	0.010168	0.010269	0.010306	0.010514	0.010506	0.010452	0.010257	0.010475
		Non-striped PC loss	0.008075	0.008066	0.008047	0.00795	0.007844	0.007699	0.007735	0.007753	0.007842	0.007879	0.008034	0.008126	0.00805	0.007889	0.007986	0.008075	0.008085	0.007975	0.007949	0.007916	0.008051	0.008117	0.008111	0.008061	0.008056	0.008	0.008142	0.008245	0.008294	0.008285	0.008324	0.008336	0.008275	0.008142	0.008119	0.008026	0.008025	0.008012	0.008089	0.008089	0.008138	0.008128	0.00811	0.008034	0.008106	0.008157	0.008289
		Non-striped PC loss	0.00839	0.008415	0.008344	0.008222	0.008403	0.008545	0.00878	0.008941	0.0088	0.008595	0.008415	0.008195	0.008472	0.008806	0.008889	0.008876	0.00887	0.008766	0.008696	0.008586	0.008731	0.008834	0.009071	0.009237	0.009068	0.008777	0.008419	0.008055	0.00833	0.008628	0.009201	0.009726	0.009425	0.008936	0.008449	0.007947	0.008097	0.008334	0.009121	0.00984	0.009827	0.009689	0.009352	0.008864	0.008485	0.008103	0.008159
		Striped PC loss	0.005389	0.005407	0.005323	0.005264	0.005272	0.005301	0.005285	0.005271	0.005311	0.005366	0.005336	0.005302	0.005306	0.005325	0.005311	0.005304	0.005269	0.005246	0.005281	0.005346	0.005369	0.005399	0.005409	0.00541	0.005311	0.005237	0.005299	0.00538	0.005362	0.005353	0.005369	0.005394	0.005364	0.005345	0.005368	0.005399	0.005372	0.005358	0.005347	0.00535	0.005379	0.005414	0.005386	0.00537	0.005369	0.005387	0.005409
		Striped PC loss	0.006401	0.0064	0.006331	0.006272	0.006286	0.006299	0.006224	0.006152	0.006099	0.00609	0.005986	0.005889	0.005924	0.00599	0.005991	0.005988	0.005868	0.005766	0.005647	0.005596	0.005739	0.005917	0.005917	0.005904	0.005838	0.005766	0.00568	0.005614	0.005649	0.005705	0.005749	0.005818	0.005928	0.006055	0.005995	0.005937	0.005773	0.005663	0.005674	0.005729	0.005814	0.005884	0.005776	0.005664	0.005631	0.005623	0.005686
		Striped PC loss	0.007355	0.00717	0.007036	0.006921	0.006901	0.00685	0.006832	0.006827	0.006965	0.007098	0.007069	0.006996	0.007017	0.007034	0.006967	0.006871	0.006782	0.006678	0.006657	0.006654	0.006688	0.006706	0.006685	0.00666	0.006668	0.006676	0.006692	0.006719	0.006811	0.006886	0.006832	0.006758	0.006753	0.006728	0.006675	0.00662	0.006754	0.006884	0.006875	0.006828	0.006908	0.007002	0.007078	0.00711	0.007126	0.007125	0.007206
		Striped PC loss	0.006207	0.006221	0.006158	0.006085	0.006078	0.006063	0.006134	0.006181	0.006255	0.00631	0.006304	0.006293	0.006293	0.006293	0.006311	0.006321	0.006278	0.006219	0.006235	0.006252	0.006258	0.006247	0.006215	0.006176	0.00614	0.006098	0.006093	0.006081	0.006075	0.006057	0.006048	0.006048	0.006112	0.006164	0.006209	0.00624	0.006231	0.006211	0.006202	0.00619	0.00619	0.006182	0.006215	0.006233	0.006193	0.006139	0.006097
[truncated: 1,086 more columns]
