# Supplementary material for: Cerebellar Purkinje cell stripe patterns reveal a differential vulnerability and resistance to cell loss during normal aging in mice
Source: eLife. 2025 Dec 1;14:RP106273. doi: 10.7554/eLife.106273 (PMC12668675; doi:10.7554/eLife.106273)
Supplement: Figure 2—source data 1. [file elife-106273-fig2-data1.xlsx]

## Sheet: Figure 2C
Figure 2C	Young	Aged without PC loss	Aged with PC loss
	130.275	126.706	82.7713
	157.531	145.696	116.437
	143.043	135.944	97.4223
	125.475	122.311	86.511
	128.156	143.39	87.6557
		140.001	105.652
			91.686
