# Supplementary material for: Cerebellar Purkinje cell stripe patterns reveal a differential vulnerability and resistance to cell loss during normal aging in mice
Source: eLife. 2025 Dec 1;14:RP106273. doi: 10.7554/eLife.106273 (PMC12668675; doi:10.7554/eLife.106273)
Supplement: Figure 3—figure supplement 1—source data 1. [file elife-106273-fig3-figsupp1-data1.xlsx]

## Sheet: Suppl. Figure 3
Figure	Panel
Supplementary 3	A		Distance	0	1.289	2.577	3.866	5.155	6.443	7.732	9.021	10.309	11.598	12.887	14.175	15.464	16.753	18.041	19.33	20.619	21.907	23.196	24.485	25.773	27.062	28.351	29.639	30.928	32.216	33.505	34.794	36.082	37.371	38.66	39.948	41.237	42.526	43.814	45.103	46.392	47.68	48.969	50.258	51.546	52.835	54.124	55.412	56.701	57.99
		Calbindin	Mean	24.3399	24.8684	25.2502	25.409	25.4261	25.917	26.3731	26.7599	27.0042	27.2833	27.0419	27.2784	27.3915	27.3809	27.3239	27.0482	27.2585	26.7174	26.5075	26.0989	26.1244	25.3371	25.083	24.6978	24.5334	23.726	23.2781	22.9782	22.5193	22.1223	21.7429	21.2686	21.2783	20.7522	20.8754	20.7196	21.0749	20.9591	21.2444	21.5363	21.5728	21.3506	21.2343	20.9777	21.3937	21.4366
			SEM	6.75166	7.02896	7.22621	7.28525	7.30606	7.53532	7.77335	7.9871	8.13366	8.30156	8.21771	8.35945	8.42395	8.42516	8.45982	8.461	8.66751	8.73191	8.74942	8.70336	8.502	8.24437	7.9763	7.67426	7.3446	6.84899	6.48849	6.20052	5.90451	5.65089	5.45858	5.34762	5.28303	5.1433	5.10305	5.06849	5.10459	5.12822	5.16598	5.22105	5.21069	5.14765	5.06369	5.07059	5.26319	5.5011
			N	4	4	4	4	4	4	4	4	4	4	4	4	4	4	4	4	4	4	4	4	4	4	4	4	4	4	4	4	4	4	4	4	4	4	4	4	4	4	4	4	4	4	4	4	4	4
		GFP	Mean	12.0128	12.1681	12.3671	12.6323	12.6065	12.6661	12.9913	13.1053	13.121	13.2536	13.2597	13.2037	13.2817	13.3621	13.3845	13.2802	13.1664	13.0372	12.9415	12.7259	12.5474	12.3701	12.3917	12.4588	12.3893	12.3535	12.362	12.2819	12.1752	11.9413	11.7323	11.695	11.6803	11.4736	11.397	11.5233	11.7196	11.8287	12.0174	12.1928	12.3494	12.2801	11.9731	11.7624	11.7091	11.7859
			SEM	4.03472	4.04558	3.94134	3.82945	3.79845	3.85336	3.93773	4.03966	4.11734	4.12921	4.09308	4.13278	4.26433	4.35614	4.34291	4.37297	4.45077	4.65891	4.78402	4.6974	4.55704	4.45787	4.43525	4.39789	4.28232	4.11262	4.02911	4.03437	3.93842	3.86628	3.81975	3.9245	4.064	4.02601	3.97254	3.96431	4.06808	4.0938	4.07289	4.12184	4.18972	4.15553	4.03558	4.01495	4.12114	4.25715
			N	4	4	4	4	4	4	4	4	4	4	4	4	4	4	4	4	4	4	4	4	4	4	4	4	4	4	4	4	4	4	4	4	4	4	4	4	4	4	4	4	4	4	4	4	4	4
	A'	Distance	0	1.289	2.577	3.866	5.155	6.443	7.732	9.021	10.309	11.598	12.887	14.175	15.464	16.753	18.041	19.33	20.619	21.907	23.196	24.485	25.773	27.062	28.351	29.639	30.928	32.216	33.505	34.794	36.082	37.371	38.66	39.948	41.237	42.526	43.814	45.103	46.392	47.68	48.969	50.258	51.546	52.835	54.124	55.412	56.701	57.99	59.278
		Calbindin	17.6806	17.6777	17.6873	17.7333	17.648	17.7487	17.7659	17.8494	17.8753	17.9213	17.9194	17.9012	17.8408	17.8427	17.8273	17.9386	17.977	18.0854	18.211	18.2657	18.3731	18.4192	18.541	18.5928	18.7386	18.8029	18.9439	19.0772	19.2288	19.3957	19.4878	19.6278	19.6614	19.6748	19.6307	19.6806	19.7439	19.7669	19.7343	19.7036	19.6182	19.4926	19.435	19.3535	19.4149	19.4091	19.4801
		GFP	6.3674	6.3333	6.3621	6.3276	6.2787	6.2494	6.2192	6.2432	6.2863	6.3664	6.4283	6.4149	6.3333	6.2647	6.2307	6.2782	6.3257	6.4034	6.5655	6.6633	6.7103	6.7444	6.8062	6.8686	6.9803	7.1415	7.2489	7.3333	7.4969	7.6528	7.7784	7.9559	8.0676	8.0182	7.9444	7.9981	8.152	8.2494	8.4115	8.364	8.2269	8.0825	8.0532	8.1261	8.1693	8.1851	8.3084
		Calbindin	37.0954	37.6978	37.9578	38.4115	38.8998	39.9914	41.4734	42.8739	43.8235	44.4921	44.3492	44.7588	45.1242	45.4657	46.1189	47.106	48.2552	49.3813	49.6671	49.6067	48.6091	47.5568	46.3261	44.9237	43.3842	41.3094	39.7324	38.3242	37.0388	35.9827	35.1808	34.8499	34.5046	33.9185	33.7055	33.5703	33.8321	34.0134	34.1458	34.2897	34.1487	33.9079	33.4532	33.6144	34.4623	35.6528	37.0331
		GFP	23.9189	24.0317	23.7295	23.2652	23.1247	23.3938	23.7396	24.2235	24.6096	24.7175	24.599	24.7583	25.294	25.6643	25.6283	25.7885	26.0863	26.7823	27.1703	26.7353	26.1463	25.6839	25.6379	25.5832	25.1717	24.6225	24.3803	24.341	23.9621	23.53	23.1832	23.4436	23.8192	23.4758	23.2355	23.3549	23.8508	24.0384	24.1861	24.5319	24.9084	24.7372	24.0547	23.7458	23.9765	24.4484	25.3995
		Calbindin	33.9683	35.4782	36.7261	36.7942	36.4038	37.0906	37.3026	37.3094	37.2671	37.7199	36.987	37.5837	37.6604	37.201	36.3156	34.1007	33.7679	30.3866	29.1501	27.5396	28.5871	26.5458	26.7137	26.6005	27.3103	26.0374	25.6508	25.7746	25.0801	24.3549	23.5463	21.8072	22.1813	20.6177	21.3765	20.8259	21.7995	21.0859	22.1305	23.199	23.5914	23.058	23.1261	22.0125	22.7847	21.7707	22.1765
		GFP	9.9132	10.4647	11.5453	13.095	13.1271	13.0235	13.8993	13.8115	13.4302	13.729	13.8014	13.4671	13.2811	13.2547	13.3185	12.6283	11.7875	10.541	9.6053	9.0628	8.858	8.6096	8.7271	9.0187	9.0412	9.2547	9.3448	8.9746	8.7789	8.1487	7.648	7.0849	6.5683	6.2029	6.1693	6.4547	6.4302	6.5185	6.9233	7.3257	7.7223	7.7554	7.2619	6.646	6.1832	6.0062	6.2101
		Calbindin	8.6153	8.6201	8.6297	8.6969	8.753	8.8374	8.9506	9.0067	9.0508	9	8.9118	8.87	8.9405	9.0144	9.0336	9.0475	9.0341	9.0163	9.0019	8.9837	8.9285	8.8264	8.7511	8.6743	8.7007	8.7544	8.7851	8.7367	8.7295	8.7559	8.7568	8.7894	8.7659	8.7976	8.789	8.8014	8.9242	8.9703	8.9669	8.953	8.9329	8.9439	8.9228	8.9305	8.9127	8.9137	8.9271
		GFP	7.8518	7.84269	7.83165	7.84125	7.89544	7.9976	8.10695	8.14293	8.15779	8.20144	8.21007	8.17458	8.21823	8.26475	8.36067	8.4259	8.46619	8.42206	8.42494	8.44221	8.47482	8.44269	8.39568	8.36451	8.36403	8.3952	8.47386	8.47866	8.46283	8.43357	8.31942	8.29544	8.26619	8.1976	8.23885	8.28537	8.44556	8.50839	8.54868	8.54964	8.54005	8.54532	8.52278	8.53189	8.50743	8.50408	8.4542
[truncated: 1,334 more columns]
