# Supplementary material for: Cerebellar Purkinje cell stripe patterns reveal a differential vulnerability and resistance to cell loss during normal aging in mice
Source: eLife. 2025 Dec 1;14:RP106273. doi: 10.7554/eLife.106273 (PMC12668675; doi:10.7554/eLife.106273)
Supplement: Figure 7—figure supplement 1—source data 1. [file elife-106273-fig7-figsupp1-data1.xlsx]

## Sheet: Suppl. Figure 6
Supplementary Figure 6	Sex	Weight (g)	Peak Power (V2)	Age (months)
	M	51	3e-05	16.4
	M	54.8	2.57e-05	16.4
	M	48.4	1.53e-05	16
	M	42.7	4.09e-05	16
	M	45.7	3.69e-05	16
	F	35.2	1.51e-05	16.9
	F	39.2	7.68e-06	19.6
	F	44.6	7.1e-06	19.6
	F	42	1.83e-05	19.3
	M	48.8	2.21e-05	17.8
	M	43.3	1.19e-05	15.2
	M	41.5	2.17e-05	15.2
