# Supplementary material for: Cerebellar Purkinje cell stripe patterns reveal a differential vulnerability and resistance to cell loss during normal aging in mice
Source: eLife. 2025 Dec 1;14:RP106273. doi: 10.7554/eLife.106273 (PMC12668675; doi:10.7554/eLife.106273)
Supplement: Figure 7—source data 1. [file elife-106273-fig7-data1.xlsx]

## Sheet: Figure 7
Figure	Panel
7	B	Group	Day	Mean	SEM	N
		Young	1	182.4	9.885	8
		Young	2	198.8	22.13	8
		Young	3	241.4	9.348	8
		Aged	1	66.53	15.95	12
		Aged	2	98.25	23.3	12
		Aged	3	122.4	22.68	12
7	B'	Group	Day	Mean	SEM	N
		Young	1	182.4	9.885	8
		Young	2	198.8	22.13	8
		Young	3	241.4	9.348	8
		Aged without PC loss	1	97.78	24.85	6
		Aged without PC loss	2	127.4	43.91	6
		Aged without PC loss	3	147.1	37.45	6
		Aged with PC loss	1	35.28	10.54	6
		Aged with PC loss	2	69.06	10.89	6
		Aged with PC loss	3	97.78	24.85	6
7	C	Easy trial		Difficult trial
		Young	Aged	Young	Aged
		1.66667	2	5	13
		1.33333	2.66667	8.66667	13
		0.666667	1.33333	15.6667	10
		1.33333	1.66667	9	8.33333
		4.66667	0.333333	10.6667	13.3333
		4.33333	1.33333	5.33333	3
		4.66667	1	4.66667	6.66667
		4.33333	0.333333	14	13.3333
			3		4.66667
			5		10.6667
			2.33333		5.66667
			2.33333		9.33333
			1		4.33333
	C'	Easy trial			Difficult trial
		Young	Aged without PC loss	Aged with PC loss	Young	Aged without PC loss	Aged with PC loss
		1.66667	3	2.33333	5	4.66667	9.33333
		1.33333	5	1	8.66667	10.6667	6.66667
		0.666667	0.333333	0.333333	15.6667	13.3333	13.3333
		1.33333	2.33333	1.33333	9	5.66667	10
		4.66667	1.33333	2	10.6667	3	13
		4.33333	1	2.66667	5.33333	4.33333	13
		4.66667			4.66667
		4.33333			14
	D		Young			Aged
		Frequency	Mean	SEM	N	Mean	SEM	N
		0	9.32273e-09	1.85872e-09	11	8.94167e-09	1.57882e-09	12
		0.5	8.73818e-09	9.57085e-10	11	9.24667e-09	8.88719e-10	12
		1	5.15364e-09	1.49102e-10	11	5.50917e-09	4.39108e-10	12
		1.5	4.95e-09	2.30832e-10	11	5.55083e-09	4.06305e-10	12
		2	4.9e-09	2.4808e-10	11	5.57e-09	3.67081e-10	12
		2.5	5.09727e-09	2.42259e-10	11	5.63083e-09	5.30956e-10	12
		3	5.10091e-09	2.1477e-10	11	6.08917e-09	4.41462e-10	12
		3.5	5.73727e-09	2.70616e-10	11	6.88083e-09	4.71864e-10	12
		4	6.80636e-09	5.45299e-10	11	8.60417e-09	8.2325e-10	12
		4.5	8.09273e-09	6.64055e-10	11	1.16092e-08	1.28863e-09	12
		5	1.17055e-08	1.25859e-09	11	1.69092e-08	2.37757e-09	12
		5.5	1.79118e-08	2.47749e-09	11	2.53833e-08	3.49249e-09	12
		6	2.81818e-08	4.16993e-09	11	4.14167e-08	6.37041e-09	12
		6.5	4.48545e-08	7.23256e-09	11	7.45583e-08	1.37411e-08	12
		7	6.54909e-08	1.14334e-08	11	1.15408e-07	1.95299e-08	12
		7.5	1.11109e-07	2.05748e-08	11	2.04217e-07	2.86663e-08	12
		8	2.25827e-07	4.25922e-08	11	3.54492e-07	5.65464e-08	12
		8.5	5.47727e-07	1.1232e-07	11	7.01167e-07	1.16061e-07	12
		9	1.82827e-06	3.82887e-07	11	1.71975e-06	2.68e-07	12
		9.5	4.33209e-06	6.63735e-07	11	4.97e-06	8.77732e-07	12
		10	8.98455e-06	1.64061e-06	11	1.58275e-05	3.0302e-06	12
		10.5	1.01709e-05	1.60773e-06	11	1.98733e-05	2.90134e-06	12
		11	7.25364e-06	1.85866e-06	11	1.0585e-05	1.42576e-06	12
		11.5	3.15464e-06	7.84083e-07	11	4.13917e-06	6.65265e-07	12
		12	1.44336e-06	2.79036e-07	11	2.00383e-06	3.58848e-07	12
		12.5	8.61364e-07	1.71757e-07	11	1.04292e-06	1.83627e-07	12
		13	5.34727e-07	1.03577e-07	11	6.52083e-07	9.92576e-08	12
		13.5	3.397e-07	6.42016e-08	11	5.16417e-07	7.28524e-08	12
		14	2.785e-07	5.38896e-08	11	4.31417e-07	5.77742e-08	12
		14.5	2.21509e-07	3.82035e-08	11	4.06e-07	5.2851e-08	12
		15	2.06964e-07	3.10442e-08	11	5.2975e-07	6.04372e-08	12
		15.5	2.80582e-07	7.44637e-08	11	9.93667e-07	1.01963e-07	12
		16	3.87045e-07	1.14991e-07	11	1.34525e-06	1.51113e-07	12
		16.5	3.51255e-07	9.41442e-08	11	1.08833e-06	1.40251e-07	12
		17	2.39645e-07	5.69147e-08	11	7.23333e-07	1.04094e-07	12
		17.5	1.64118e-07	2.72758e-08	11	4.76083e-07	5.89952e-08	12
		18	1.39727e-07	2.04832e-08	11	3.60833e-07	4.44777e-08	12
		18.5	1.14827e-07	1.59153e-08	11	2.98583e-07	3.43406e-08	12
		19	1.14e-07	1.56261e-08	11	2.56167e-07	3.44832e-08	12
		19.5	1.009e-07	1.11724e-08	11	2.26e-07	2.6091e-08	12
		20	9.16e-08	1.00835e-08	11	1.875e-07	1.89171e-08	12
		20.5	8.55273e-08	1.11685e-08	11	1.70483e-07	1.91616e-08	12
		21	8.49636e-08	1.11565e-08	11	1.80808e-07	2.54236e-08	12
		21.5	8.55091e-08	9.95185e-09	11	1.87858e-07	2.53874e-08	12
		22	8.18455e-08	9.26533e-09	11	1.96525e-07	2.84809e-08	12
		22.5	8.63455e-08	1.35808e-08	11	1.82475e-07	2.72704e-08	12
		23	8.80091e-08	1.35632e-08	11	1.81892e-07	2.78273e-08	12
		23.5	9.32273e-08	9.17744e-09	11	2.09483e-07	3.15656e-08	12
		24	9.60455e-08	1.39795e-08	11	2.31e-07	2.91171e-08	12
		24.5	1.02845e-07	1.68895e-08	11	2.45583e-07	3.30838e-08	12
		25	1.09891e-07	1.74323e-08	11	2.96333e-07	4.82144e-08	12
		25.5	1.237e-07	1.70071e-08	11	3.36333e-07	6.11457e-08	12
		26	1.62164e-07	2.19215e-08	11	4.28417e-07	6.15428e-08	12
		26.5	2.05182e-07	3.11556e-08	11	5.34583e-07	7.75797e-08	12
		27	1.77455e-07	2.76311e-08	11	5.15833e-07	8.993e-08	12
		27.5	2.068e-07	3.54154e-08	11	5.9475e-07	1.01445e-07	12
		28	2.42273e-07	3.47799e-08	11	6.8125e-07	1.1807e-07	12
		28.5	3.22e-07	4.51992e-08	11	8.1325e-07	1.34262e-07	12
		29	4.52545e-07	5.94619e-08	11	8.5225e-07	1.37153e-07	12
		29.5	5.72e-07	6.47191e-08	11	9.07417e-07	1.26206e-07	12
		30	6.03818e-07	7.19871e-08	11	9.97167e-07	1.59892e-07	12
	D'	Group	Young			Aged without PC loss			Aged with PC loss
		Frequency	Mean	SEM	N	Mean	SEM	N	Mean	SEM	N
		0	9.32273e-09	1.85872e-09	11	6.88833e-09	3.23248e-10	6	1.0995e-08	3.02933e-09	6
		0.5	8.73818e-09	9.57085e-10	11	7.43833e-09	3.09553e-10	6	1.1055e-08	1.43922e-09	6
		1	5.15364e-09	1.49102e-10	11	4.63e-09	1.9091e-10	6	6.38833e-09	7.09062e-10	6
		1.5	4.95e-09	2.30832e-10	11	4.93e-09	3.03337e-10	6	6.17167e-09	6.92952e-10	6
		2	4.9e-09	2.4808e-10	11	5.19167e-09	2.90418e-10	6	5.94833e-09	6.71786e-10	6
		2.5	5.09727e-09	2.42259e-10	11	5.01667e-09	2.85945e-10	6	6.245e-09	1.00388e-09	6
		3	5.10091e-09	2.1477e-10	11	5.42333e-09	8.73562e-11	6	6.755e-09	8.20088e-10	6
		3.5	5.73727e-09	2.70616e-10	11	5.995e-09	2.03875e-10	6	7.76667e-09	7.90087e-10	6
		4	6.80636e-09	5.45299e-10	11	7.06833e-09	5.18732e-10	6	1.014e-08	1.33021e-09	6
		4.5	8.09273e-09	6.64055e-10	11	1.00433e-08	1.04522e-09	6	1.3175e-08	2.28764e-09	6
		5	1.17055e-08	1.25859e-09	11	1.557e-08	2.46441e-09	6	1.82483e-08	4.25227e-09	6
		5.5	1.79118e-08	2.47749e-09	11	2.35483e-08	3.4465e-09	6	2.72183e-08	6.35953e-09	6
		6	2.81818e-08	4.16993e-09	11	3.85167e-08	5.48339e-09	6	4.43167e-08	1.2047e-08	6
		6.5	4.48545e-08	7.23256e-09	11	6.26e-08	9.0799e-09	6	8.65167e-08	2.62899e-08	6
		7	6.54909e-08	1.14334e-08	11	1.00017e-07	1.8329e-08	6	1.308e-07	3.53202e-08	6
		7.5	1.11109e-07	2.05748e-08	11	1.86167e-07	2.19764e-08	6	2.22267e-07	5.47945e-08	6
		8	2.25827e-07	4.25922e-08	11	3.13333e-07	4.34225e-08	6	3.9565e-07	1.07265e-07	6
		8.5	5.47727e-07	1.1232e-07	11	6.21e-07	1.20409e-07	6	7.81333e-07	2.05426e-07	6
		9	1.82827e-06	3.82887e-07	11	1.44617e-06	2.39749e-07	6	1.99333e-06	4.7813e-07	6
		9.5	4.33209e-06	6.63735e-07	11	3.83667e-06	4.66445e-07	6	6.10333e-06	1.63048e-06	6
		10	8.98455e-06	1.64061e-06	11	1.27967e-05	1.54993e-06	6	1.88583e-05	5.85873e-06	6
		10.5	1.01709e-05	1.60773e-06	11	1.98e-05	3.00622e-06	6	1.99467e-05	5.29139e-06	6
		11	7.25364e-06	1.85866e-06	11	1.11233e-05	1.86602e-06	6	1.00467e-05	2.31221e-06	6
		11.5	3.15464e-06	7.84083e-07	11	3.89833e-06	7.09114e-07	6	4.38e-06	1.19218e-06	6
		12	1.44336e-06	2.79036e-07	11	1.66833e-06	2.0431e-07	6	2.33933e-06	6.92697e-07	6
		12.5	8.61364e-07	1.71757e-07	11	8.85e-07	1.19056e-07	6	1.20083e-06	3.52441e-07	6
		13	5.34727e-07	1.03577e-07	11	5.22e-07	4.53321e-08	6	7.82167e-07	1.8581e-07	6
		13.5	3.397e-07	6.42016e-08	11	4.08333e-07	5.79348e-08	6	6.245e-07	1.23789e-07	6
		14	2.785e-07	5.38896e-08	11	3.49667e-07	3.55478e-08	6	5.13167e-07	1.03681e-07	6
		14.5	2.21509e-07	3.82035e-08	11	3.385e-07	4.55403e-08	6	4.735e-07	9.16176e-08	6
		15	2.06964e-07	3.10442e-08	11	4.505e-07	6.635e-08	6	6.09e-07	9.56929e-08	6
		15.5	2.80582e-07	7.44637e-08	11	8.445e-07	1.3172e-07	6	1.14283e-06	1.39619e-07	6
		16	3.87045e-07	1.14991e-07	11	1.08383e-06	1.17991e-07	6	1.60667e-06	2.43347e-07	6
		16.5	3.51255e-07	9.41442e-08	11	9.07333e-07	1.07919e-07	6	1.26933e-06	2.48594e-07	6
		17	2.39645e-07	5.69147e-08	11	5.61e-07	6.90251e-08	6	8.85667e-07	1.79921e-07	6
		17.5	1.64118e-07	2.72758e-08	11	3.74e-07	5.17513e-08	6	5.78167e-07	9.20179e-08	6
		18	1.39727e-07	2.04832e-08	11	3.02333e-07	4.36972e-08	6	4.19333e-07	7.36617e-08	6
		18.5	1.14827e-07	1.59153e-08	11	2.64833e-07	3.43166e-08	6	3.32333e-07	5.96287e-08	6
		19	1.14e-07	1.56261e-08	11	2.20167e-07	3.59856e-08	6	2.92167e-07	5.8469e-08	6
		19.5	1.009e-07	1.11724e-08	11	2.08833e-07	3.81902e-08	6	2.43167e-07	3.76682e-08	6
		20	9.16e-08	1.00835e-08	11	1.8e-07	2.60448e-08	6	1.95e-07	2.9559e-08	6
		20.5	8.55273e-08	1.11685e-08	11	1.653e-07	3.09474e-08	6	1.75667e-07	2.54371e-08	6
		21	8.49636e-08	1.11565e-08	11	1.81617e-07	4.27831e-08	6	1.8e-07	3.18329e-08	6
		21.5	8.55091e-08	9.95185e-09	11	1.82883e-07	3.80696e-08	6	1.92833e-07	3.71038e-08	6
		22	8.18455e-08	9.26533e-09	11	1.93167e-07	3.71424e-08	6	1.99883e-07	4.67445e-08	6
		22.5	8.63455e-08	1.35808e-08	11	1.80167e-07	3.67219e-08	6	1.84783e-07	4.38355e-08	6
		23	8.80091e-08	1.35632e-08	11	1.745e-07	3.62645e-08	6	1.89283e-07	4.54996e-08	6
		23.5	9.32273e-08	9.17744e-09	11	2.045e-07	3.28864e-08	6	2.14467e-07	5.73816e-08	6
		24	9.60455e-08	1.39795e-08	11	2.16667e-07	3.71489e-08	6	2.45333e-07	4.76247e-08	6
		24.5	1.02845e-07	1.68895e-08	11	2.38833e-07	5.08641e-08	6	2.52333e-07	4.70168e-08	6
		25	1.09891e-07	1.74323e-08	11	2.88167e-07	7.62673e-08	6	3.045e-07	6.62192e-08	6
		25.5	1.237e-07	1.70071e-08	11	3.24e-07	9.76118e-08	6	3.48667e-07	8.28358e-08	6
		26	1.62164e-07	2.19215e-08	11	4.18333e-07	9.91446e-08	6	4.385e-07	8.24305e-08	6
		26.5	2.05182e-07	3.11556e-08	11	5.39167e-07	1.15593e-07	6	5.3e-07	1.14507e-07	6
		27	1.77455e-07	2.76311e-08	11	5.49667e-07	1.40764e-07	6	4.82e-07	1.23743e-07	6
		27.5	2.068e-07	3.54154e-08	11	6.11333e-07	1.45696e-07	6	5.78167e-07	1.54736e-07	6
		28	2.42273e-07	3.47799e-08	11	6.80833e-07	1.61681e-07	6	6.81667e-07	1.87611e-07	6
		28.5	3.22e-07	4.51992e-08	11	8.04833e-07	2.01177e-07	6	8.21667e-07	1.97017e-07	6
		29	4.52545e-07	5.94619e-08	11	7.92833e-07	1.84511e-07	6	9.11667e-07	2.17513e-07	6
		29.5	5.72e-07	6.47191e-08	11	8.75667e-07	1.35235e-07	6	9.39167e-07	2.26697e-07	6
		30	6.03818e-07	7.19871e-08	11	9.75833e-07	1.60256e-07	6	1.0185e-06	2.9432e-07	6
